# Supplementary material
Source: Springer Nature journal article supplement (https://www.springermedizin.de/resource/supplementary/13014_2012_736_MOESM1_ESM.pdf/9633916)

- A visit to  $\geq 1$  of the radiation centers
- Radiation therapy to  $\geq 1$  bone site
- $\geq 1$  completed REOC as evidenced by a  $>30$ -day gap in radiation therapy
- $\geq 30$  days from last REOC end date to end of study period

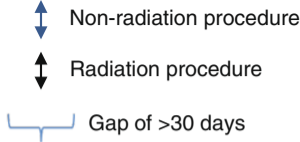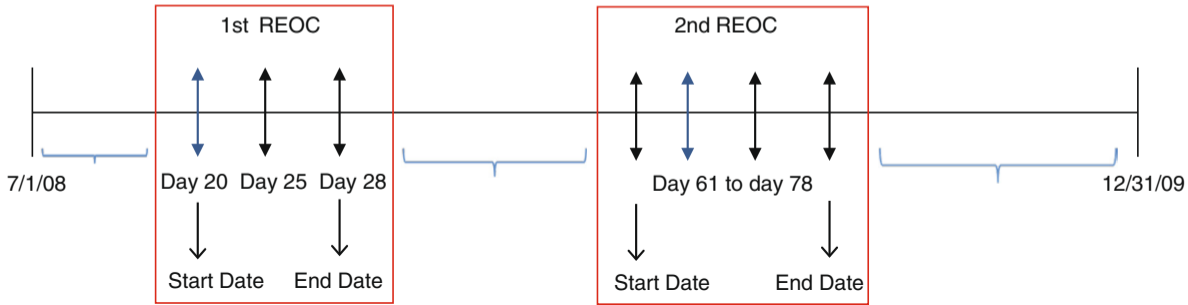

Supplement: MOESM1 [file 9633916]
